# Supplementary material for: Melanisation of Aspergillus terreus—Is Butyrolactone I Involved in the Regulation of Both DOPA and DHN Types of Pigments in Submerged Culture?
Source: MDPI journal article supplement (doi:10.3390/microorganisms5020022), 2017-05-04
Supplement: s1 [file s1]

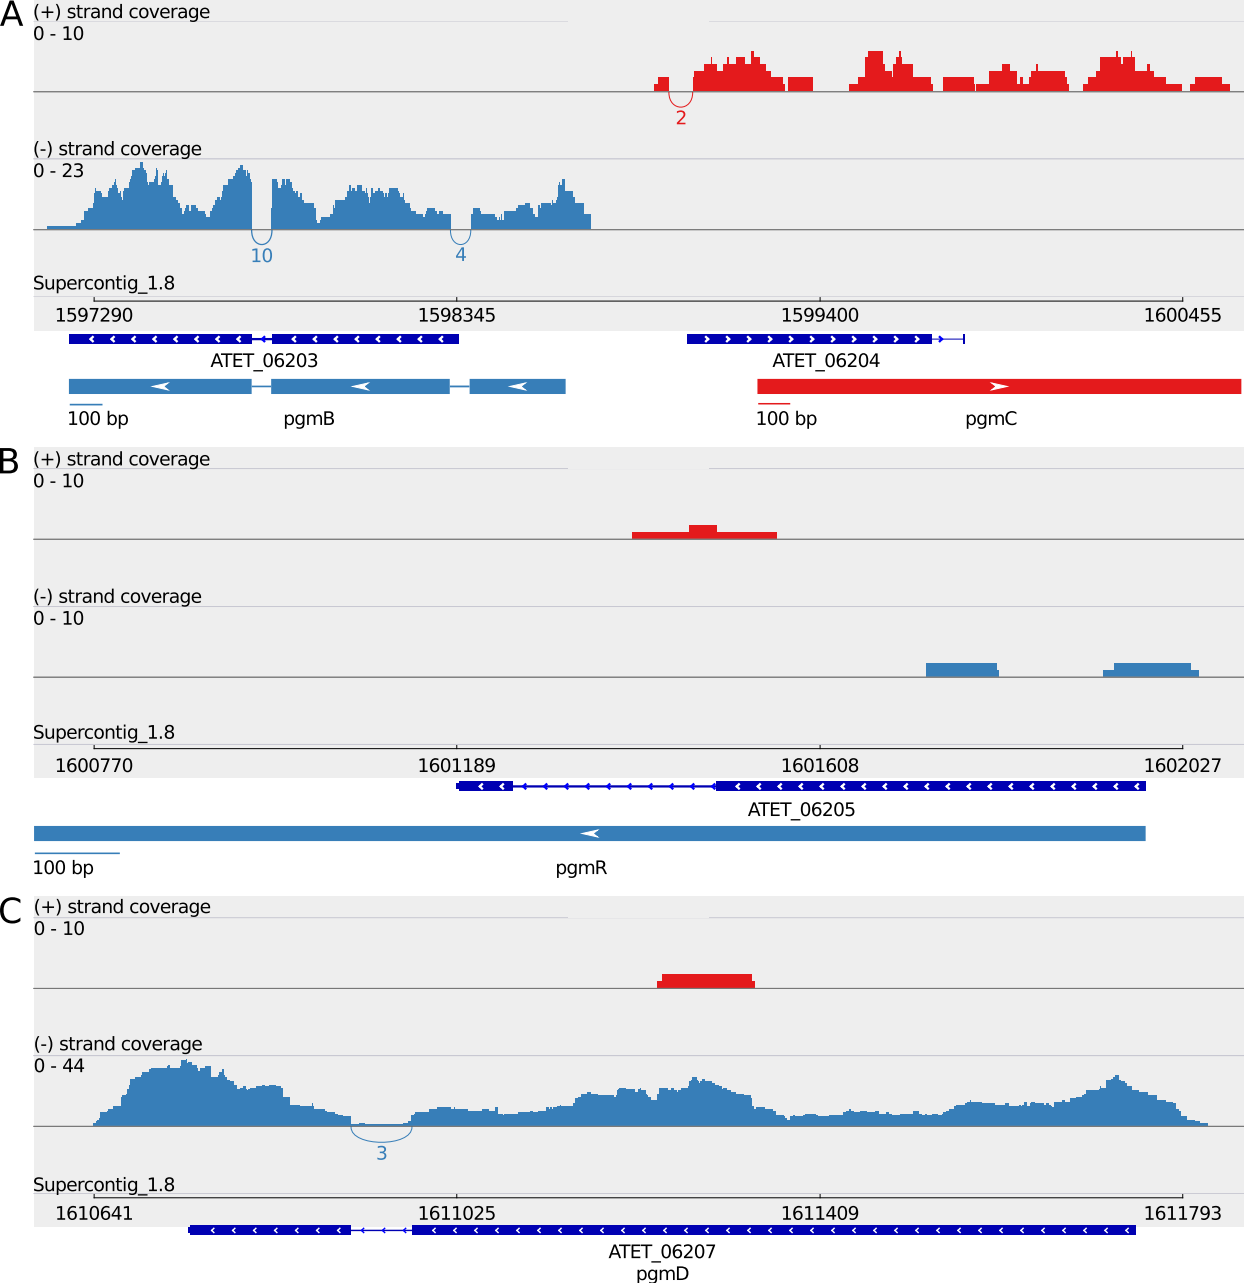

**Supplementary figure S1.** Transcript read coverages of the *pgm* cluster genes as visualised by sashimi plots. **(A)** the putative O-methyltransferase *pgmB* and the putative cytochrome p450 *pgmC*, **(B)** the putative transcription factor *pgmR* and **(C)** the putative short-chain dehydrogenase *pgmD*. Plots describe the strand-specific alignment coverage of the read sequences of *A. terreus* MUCL38669 over the corresponding genomic regions of NIH2624 Supercontig\_1.8. The curved splice junctions represent the number of spliced reads indicating an intron at that specific location. The structures and lengths for genes ATEG\_06205 and ATEG\_06204 were predicted from the corresponding genomic region. The RNA to be sequenced was extracted from the set of samples where butyrolactone I had been added at 120 hours post inoculation. The samples were collected at 24, 48, 96, 120, 144 and 216 hours post inoculation and the extracted RNA was pooled prior to sequencing.
